# Supplementary material for: Employing 11-Ketotestosterone as a Target Analyte for Adrenosterone (11OXO) Administration in Doping Controls
Source: MDPI journal article supplement (doi:10.3390/metabo14030141), 2024-02-26
Supplement: s1 [file s1]

# Employing 11-Ketotestosterone as Target Analyte for Adrenosterone (11OXO) Administrations in Doping Controls

Thomas Piper, Gregor Fußhöller and Mario Thevis

## 1) Chemical structures of all employed steroidal compounds

### 1.1) Target Analytes

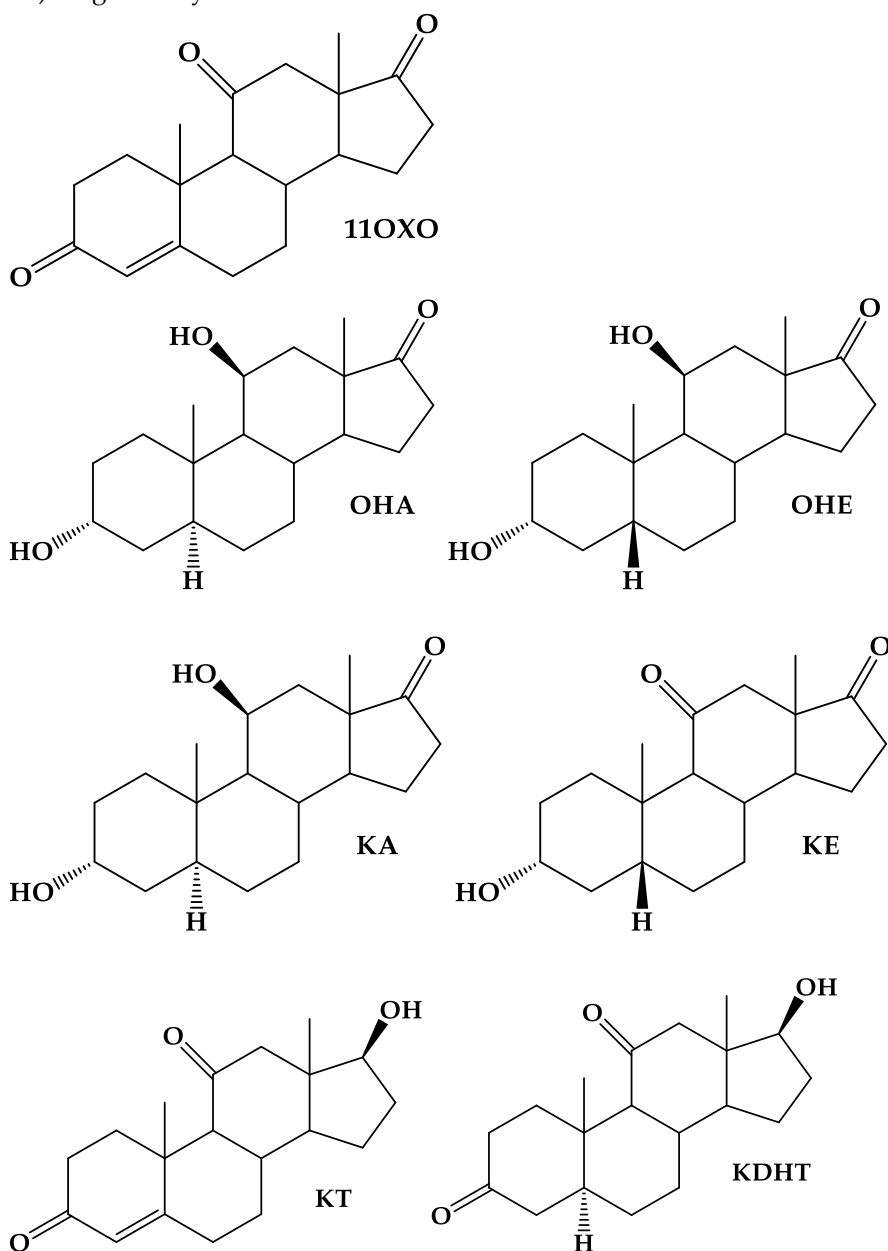

### 1.2) Endogenous reference compound

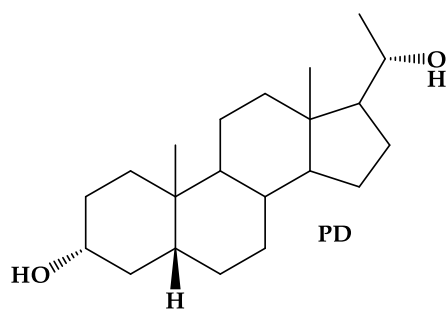

### 1.3) Internal and reference standards

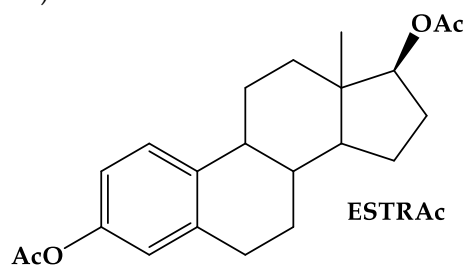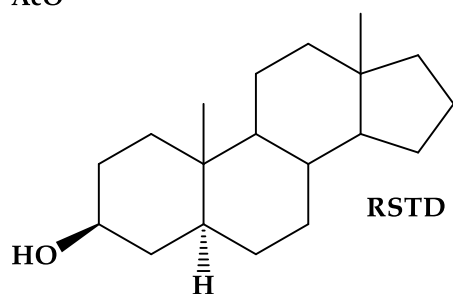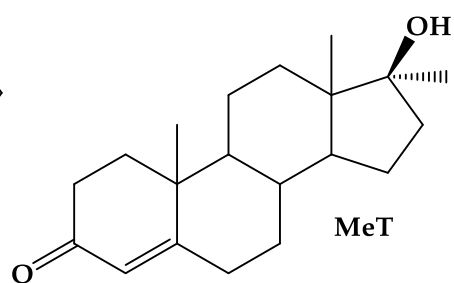

### 1.4) Additional steroids under consideration

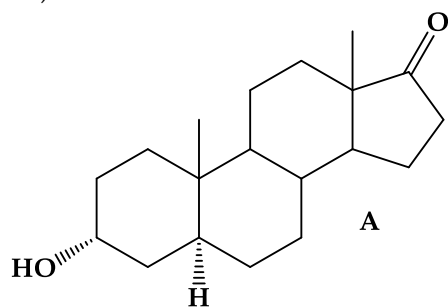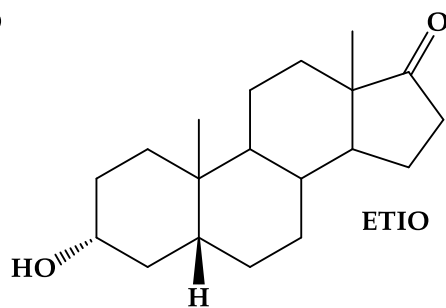

**Figure S1.** Chemical structures of all employed steroidal compounds.
